# Supplementary material
Source: PubMed Central journal article supplement (PMC8363584)
Supplement: NIHMS1726938-supplement-2.pdf [file NIHMS1726938-supplement-2.pdf]

Figure S1- related to main Figure 1

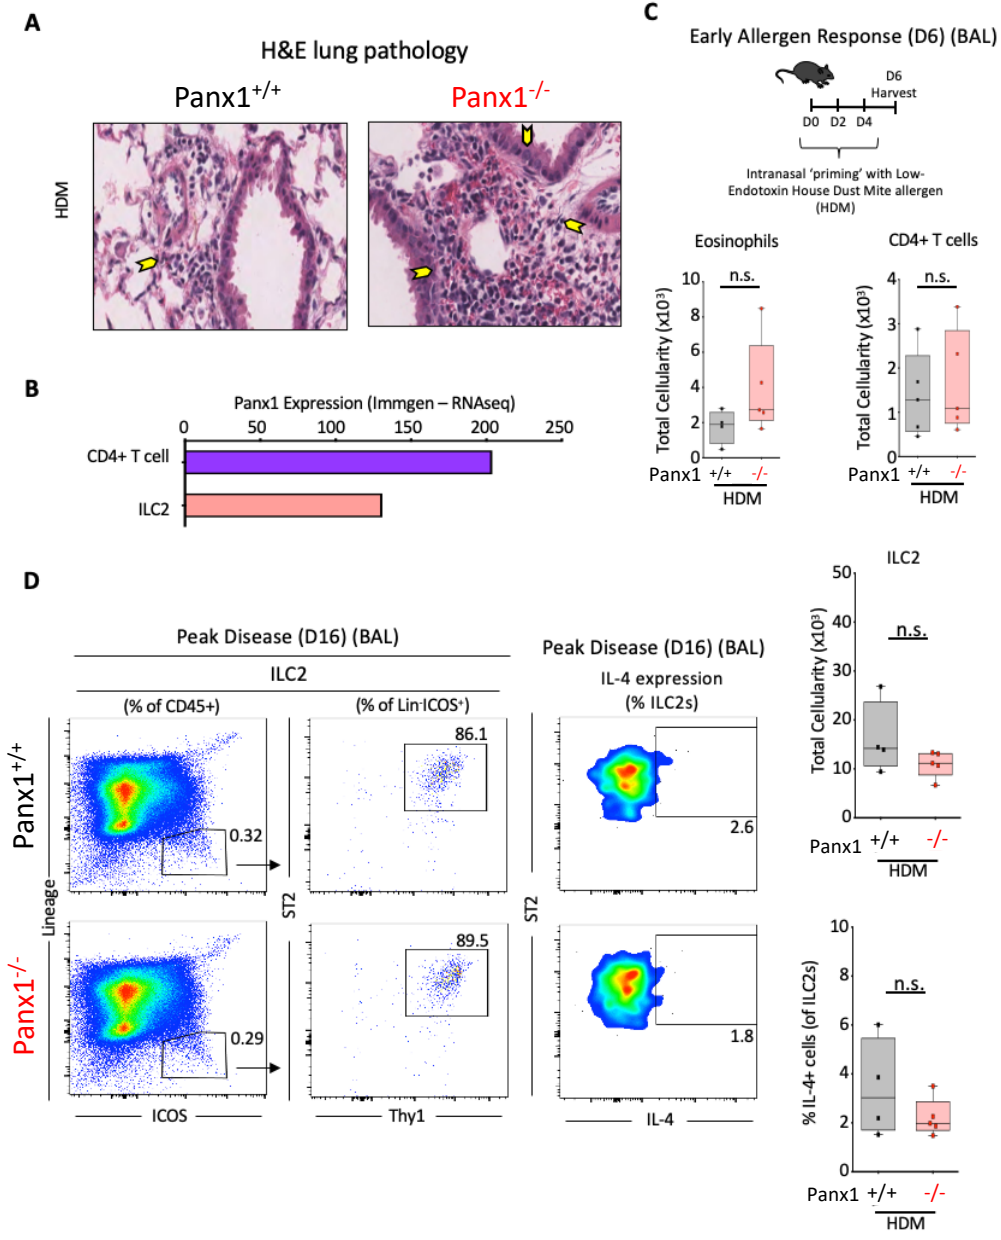

**Figure S1, related to main Figure 1. *Panx1*<sup>-/-</sup> mice exhibit increased histological disease severity at peak disease, but do not show increase in ILC2s.**

**(A)** Magnified H&E lung histology images of wild-type and global *Panx1*<sup>-/-</sup> mice from Figure 1C during HDM challenge. Arrows highlight areas of immune cell infiltration and inflammation.

**(B)** Gene expression data from the Immgen database assessing the relative expression of *Panx1* across several immune cell types.

**(C)** Schematic representation of house dust mite (HDM)-induced allergic airway inflammation for focusing on the innate immune response (top). Absolute cellularity of eosinophils and CD4<sup>+</sup> T cells in wild type or *Panx1*<sup>-/-</sup> mice after HDM challenge (bottom) (*Panx1*<sup>+/+</sup> n=4-5, *Panx1*<sup>-/-</sup> n=5). Unpaired Student's t-test.

**(D)** Flow plots showing ILC2 infiltration and percentage of IL4<sup>+</sup> ILC2s into the lung at peak disease after HDM challenge (left) and quantification (right) (*Panx1*<sup>+/+</sup> n=4, *Panx1*<sup>-/-</sup> n=5). Unpaired Student's t-test.

Figure S2- related to main Figure 2

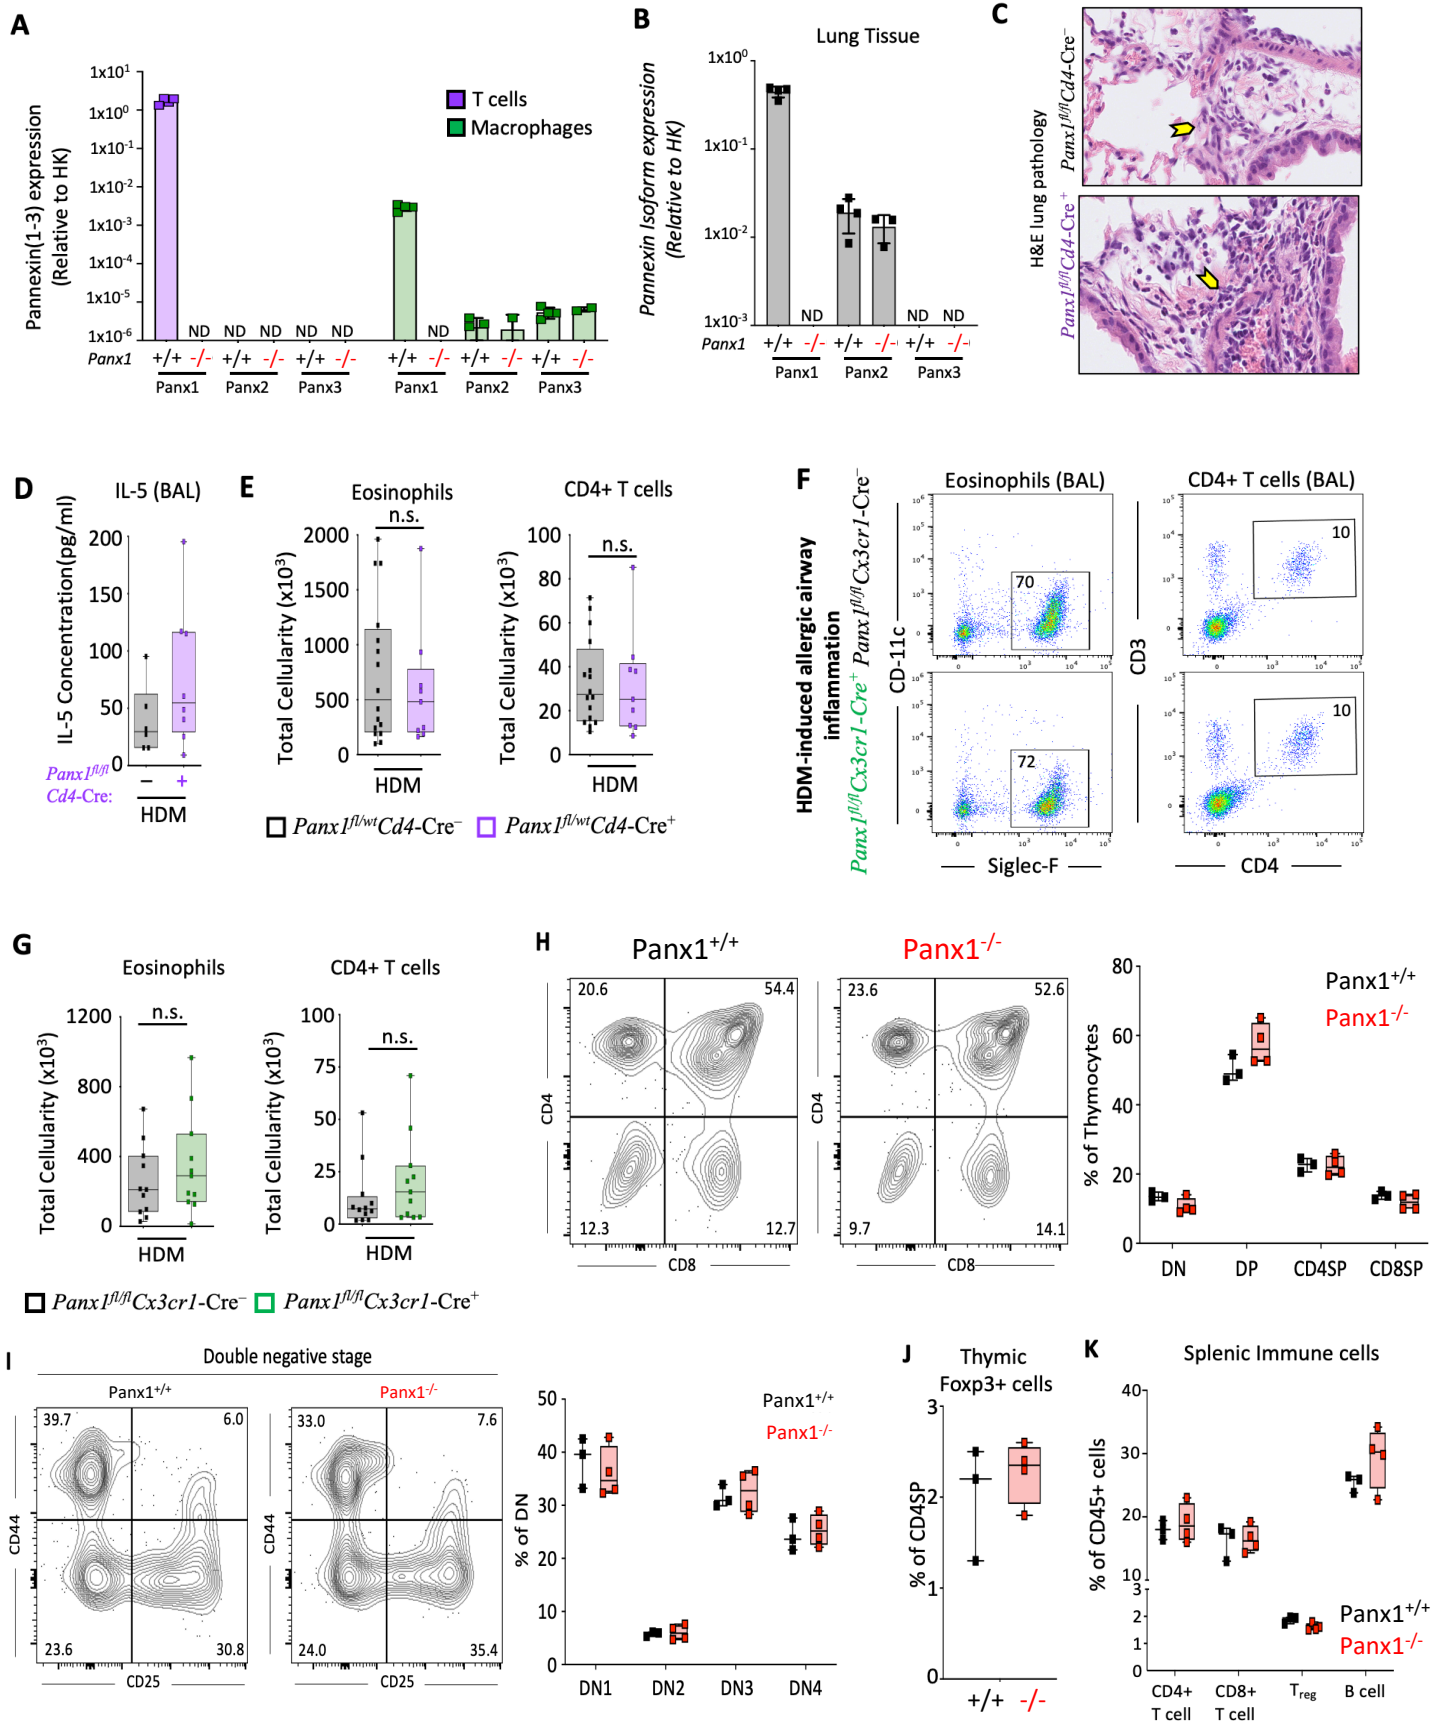

**Figure S2**, related to main Figure 2. **Panx1 gene expression in different cell types, airway inflammatory phenotype in different Panx1 deleted mice and immune characterization of the Panx1 deficient mice.**

**(A)** Panx1 expression on mouse CD4<sup>+</sup> T cells and mouse bone-marrow derived macrophages in wild-type (*n*=4) or *Panx1*<sup>-/-</sup> (*n*=3) mice via RT-qPCR.

**(B)** qPCR analysis of *Panx1*, *Panx2*, and *Panx3* expression in wild type and *Panx1*<sup>-/-</sup> mice in total lung tissue. (*Panx1*<sup>+/+</sup> *n*=4, *Panx1*<sup>-/-</sup> *n*=3).

**(C)** Magnified H&E lung histology images of *Panx1*<sup>fl/fl</sup>*Cd4-cre*<sup>-</sup> and *Panx1*<sup>fl/fl</sup>*Cd4-cre*<sup>+</sup> mice from Figure 2C during HDM challenge. Arrows highlight areas of immune cell infiltration and inflammation.

**(D)** Trending increase in IL-5 in the bronchoalveolar lavage fluid of *Panx1*<sup>fl/fl</sup> *Cd4-cre*<sup>+</sup> mice after HDM challenge.

**(E)** Absolute cellularity of eosinophils (left) and CD4<sup>+</sup> T cells (right) in the BAL of Panx1 heterozygous or wild-type mice with or without *Cd4-cre* expression after HDM challenge (*Panx1*<sup>fl/wt</sup>*Cd4-cre*<sup>-</sup> *n*=16, *Panx1*<sup>fl/wt</sup>*Cd4-cre*<sup>+</sup> *n*=9). Unpaired Student's t-test.

**(F)** Flow plots for eosinophil and CD4<sup>+</sup> T cell infiltration into the bronchoalveolar space after HDM challenge in *Panx1*<sup>fl/fl</sup>*Cx3cr1-cre* mice.

**(G)** Absolute cellularity of eosinophils (left) and CD4<sup>+</sup> T cells (right). Unpaired Student's t-test (*Panx1*<sup>fl/fl</sup>*Cx3cr1-cre*<sup>-</sup> *n*=12, *Panx1*<sup>fl/fl</sup>*Cx3cr1-cre*<sup>+</sup> *n*=11).

**(H, I)** Flow plots (left) and quantification (right) of thymocyte development in *Panx1*<sup>+/+</sup> and *Panx1*<sup>-/-</sup> mice. (*Panx1*<sup>+/+</sup> *n*=3, *Panx1*<sup>-/-</sup> *n*=4).

**(J)** Percentage of thymic Foxp3<sup>+</sup> Treg cells in *Panx1*<sup>+/+</sup> and *Panx1*<sup>-/-</sup> mice. (*Panx1*<sup>+/+</sup> *n*=3, *Panx1*<sup>-/-</sup> *n*=4).

**(K)** Percentage of splenic CD4<sup>+</sup> T cells, CD8<sup>+</sup> T cells, Treg cells, and B cells in *Panx1*<sup>+/+</sup> and *Panx1*<sup>-/-</sup> mice. (*Panx1*<sup>+/+</sup> *n*=3, *Panx1*<sup>-/-</sup> *n*=4).

Figure S3- related to main Figure 2

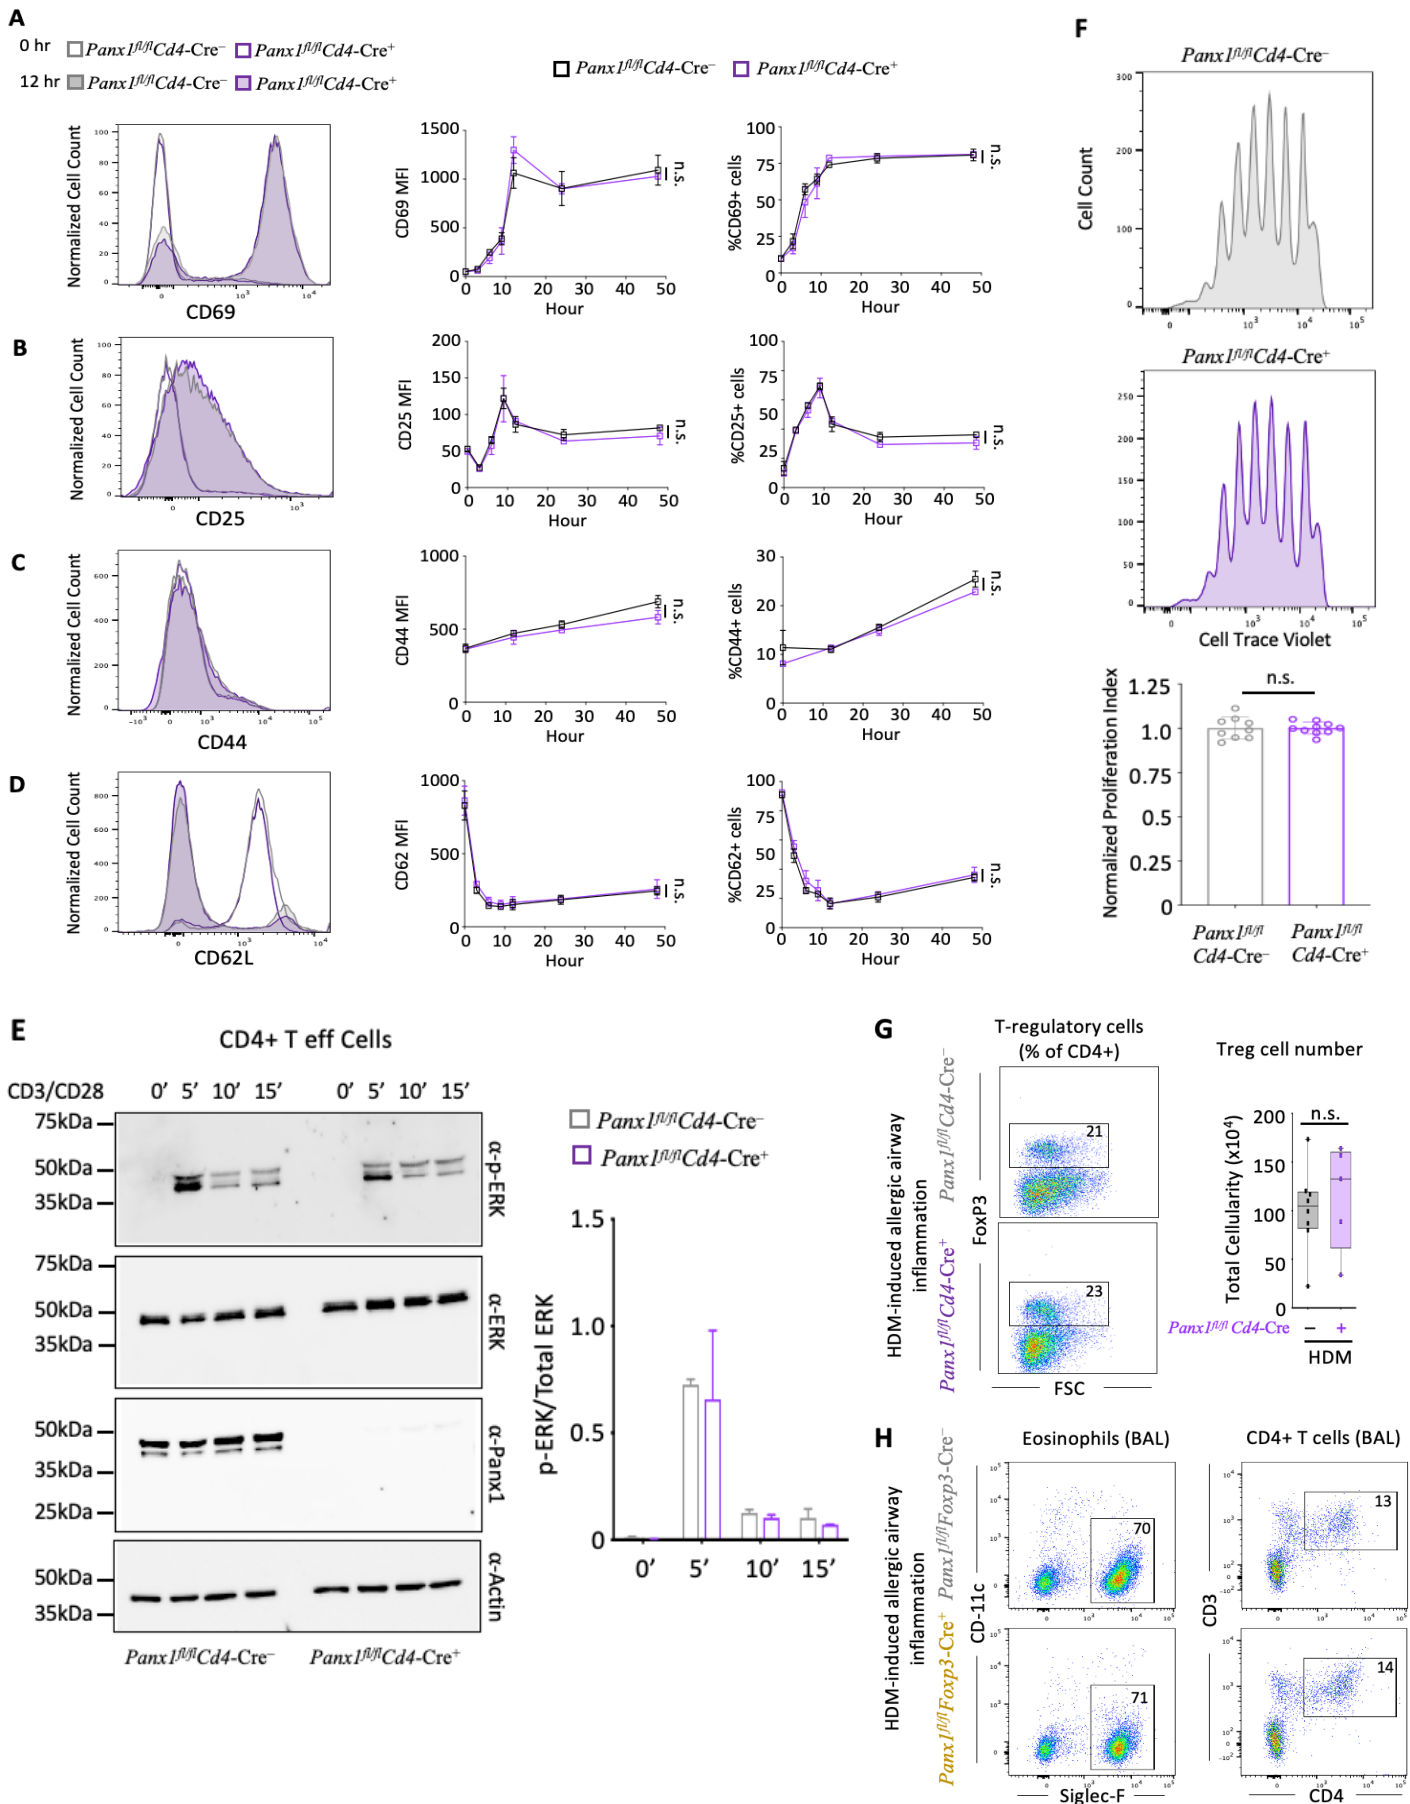

**Figure S3, related to main Figure 2. *Panx1* deletion does not intrinsically affect T effector cell activation or T regulatory intrinsic function.**

**(A-D)** Time course expression analysis of the activation markers in wild type and *Panx1*<sup>-/-</sup> CD4<sup>+</sup> Teff cells (CD4<sup>+</sup> CD25<sup>-</sup>) (right) and flow cytometry histograms at t=0 or t=12 hours after CD3 and CD28 mediated T cell activation (left). (A) CD69; (B) CD25; and (C) CD44, (D) CD62L (which goes down in expression during activation); (n=3). Data are mean  $\pm$  s.e.m. Analyzed by two-way ANOVA.

**(E)** Immuno blot time course analysis of downstream TCR signaling via p-ERK in wild-type and *Panx1*<sup>-/-</sup> CD4<sup>+</sup> T effector cells (CD4<sup>+</sup> CD25<sup>-</sup>) (left) and quantitative analysis after CD3 and CD28 mediated T cell activation (right).

**(F)** Histograms of Cell Trace Violet dilution as a measurement of T cell proliferation after CD3 and CD28 mediated activation in wild type and *Panx1*<sup>-/-</sup> CD4<sup>+</sup> Teff cells (CD4<sup>+</sup> CD25<sup>-</sup>) (left). Normalized proliferative index between wild-type (n=9) and *Panx1*<sup>-/-</sup> (n=10) CD4<sup>+</sup> T effector cells. Data are mean  $\pm$  s.d. Unpaired Student's t-test.

**(G)** (left) Flow plots showing the number of Treg cells in the lung during allergic airway inflammation. (right) Absolute cellularity of Treg cells (*Panx1*<sup>fl/fl</sup>*Cd4-cre*<sup>-</sup> n=8, *Panx1*<sup>fl/fl</sup>*Cd4-cre*<sup>+</sup> n=5). Unpaired Student's t-test.

**(H)** Flow plots showing eosinophil and CD4<sup>+</sup> T cell infiltration into the bronchoalveolar space after HDM challenge in *Panx1*<sup>fl/fl</sup>*Foxp3-cre*<sup>-</sup> and *Panx1*<sup>fl/fl</sup>*Foxp3-cre*<sup>+</sup> mice.

Figure S4- related to main Figure 3

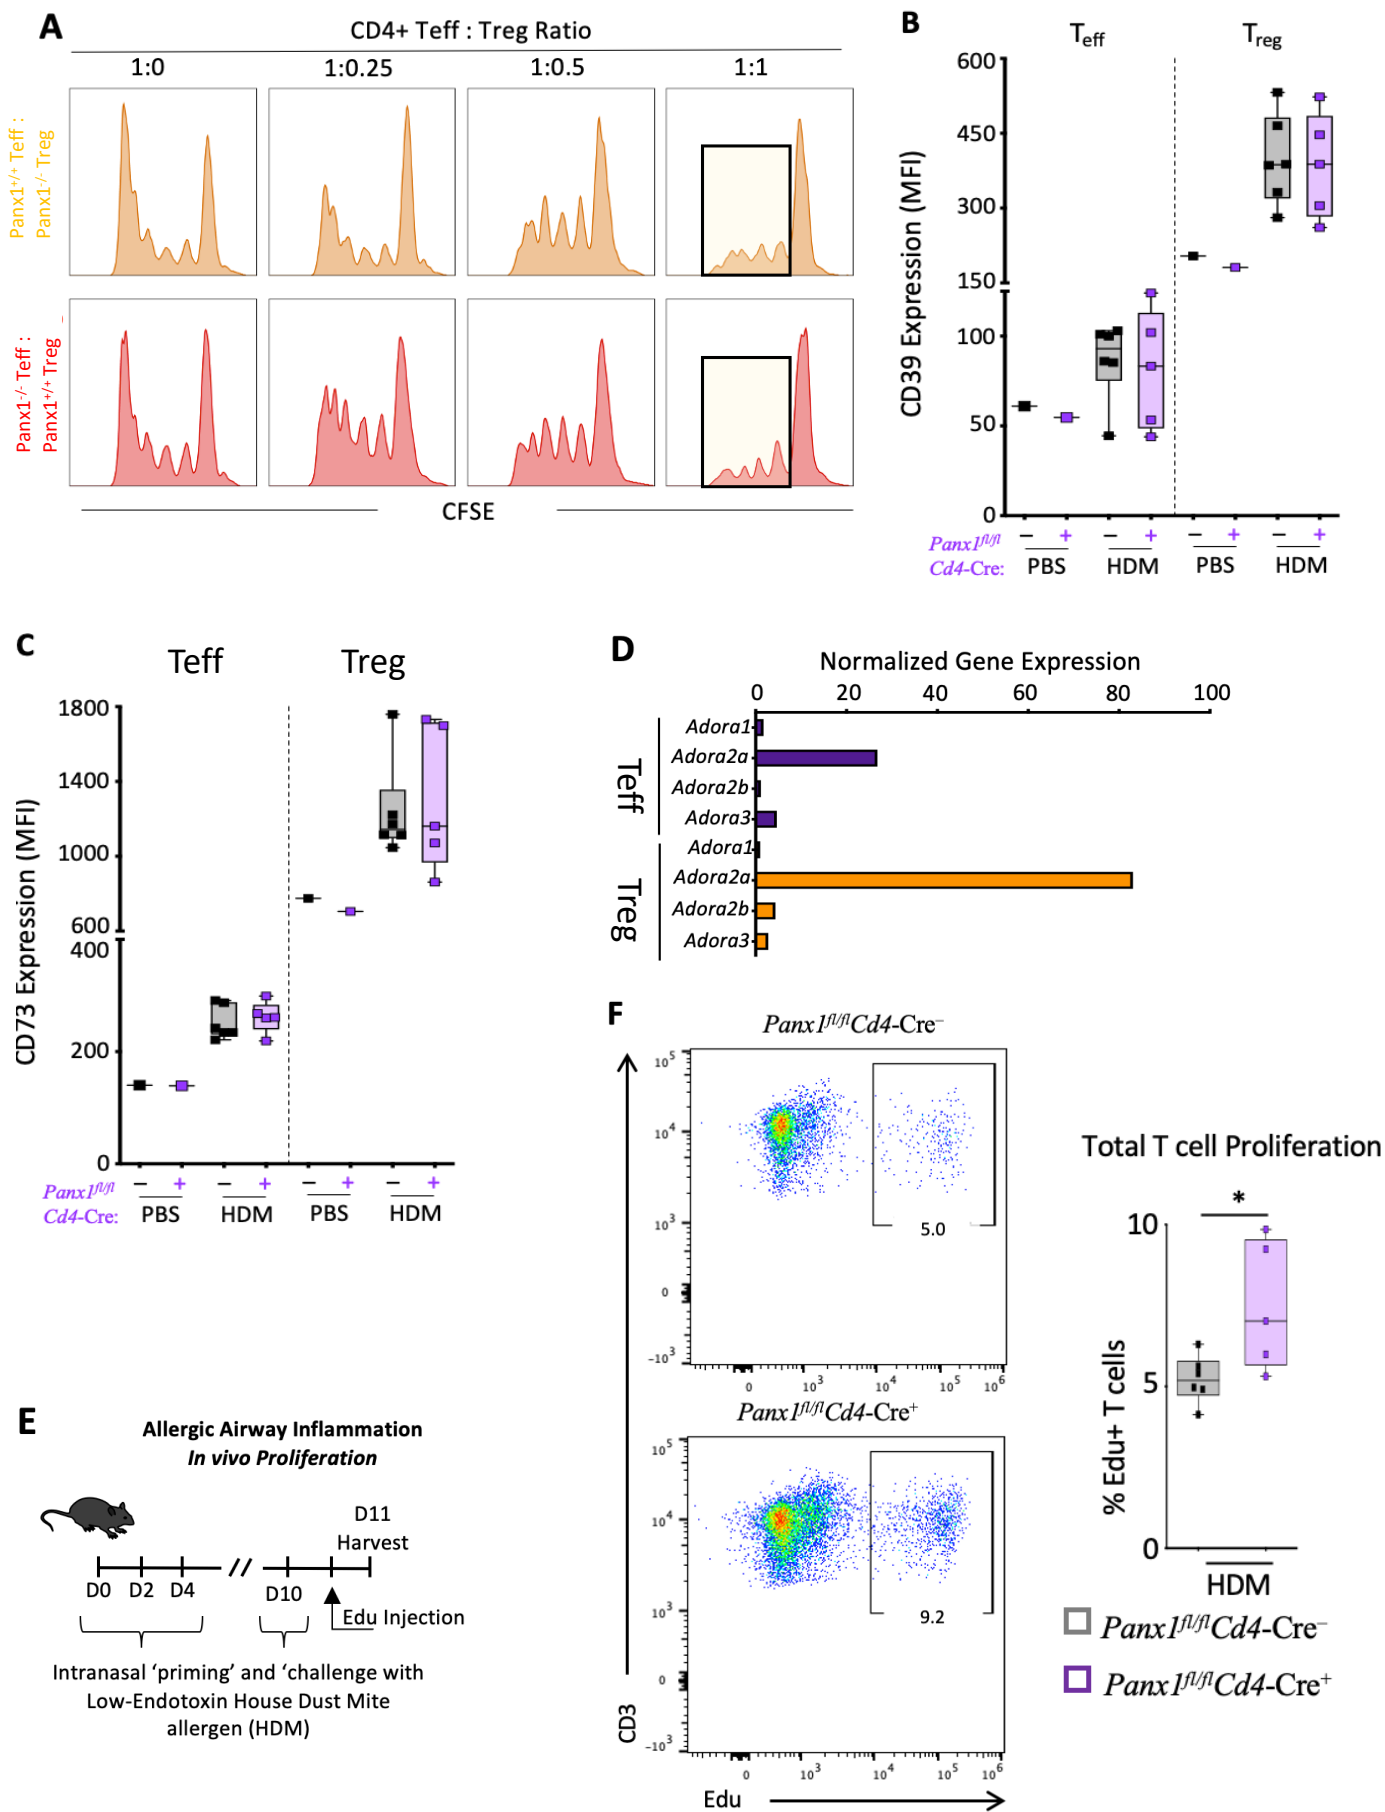

**Figure S4, related to main Figure 3. Panx1 intercellular functions during T cell proliferation and characterization of important extracellular nucleotide molecules.**

**(A)** Histograms of combinatorial suppression assays with wild type and *Panx1*<sup>-/-</sup> Teff and Treg cells at indicated cell ratios.

**(B)** MFI quantification of CD39 in *Panx1*<sup>fl/fl</sup>*Cd4-cre* mice. (*Panx1*<sup>fl/fl</sup>*Cd4-cre*<sup>-</sup> n=6, *Panx1*<sup>fl/fl</sup>*Cd4-cre*<sup>+</sup> n=5).

**(C)** MFI quantification of CD73 in *Panx1*<sup>fl/fl</sup>*Cd4-cre* mice. (*Panx1*<sup>fl/fl</sup>*Cd4-cre*<sup>-</sup> n=6, *Panx1*<sup>fl/fl</sup>*Cd4-cre*<sup>+</sup> n=5).

**(D)** Gene expression data from the Immgen database assessing the relative expression of Adenosine Receptors in Teff and Treg cells.

**(E)** Schematic representation for the modified mouse model of house dust mice induced allergic airway inflammation to measure T cell proliferation *in vivo*.

**(F)** Quantitative analysis of total CD3<sup>+</sup> EdU<sup>+</sup> T cells in *Panx1*<sup>fl/fl</sup>*Cd4-cre*<sup>-</sup> (n=6) and *Panx1*<sup>fl/fl</sup>*Cd4-cre*<sup>+</sup> (n=5) mice during HDM. Unpaired Student's t-test.



Figure S5- related to main Figure 4

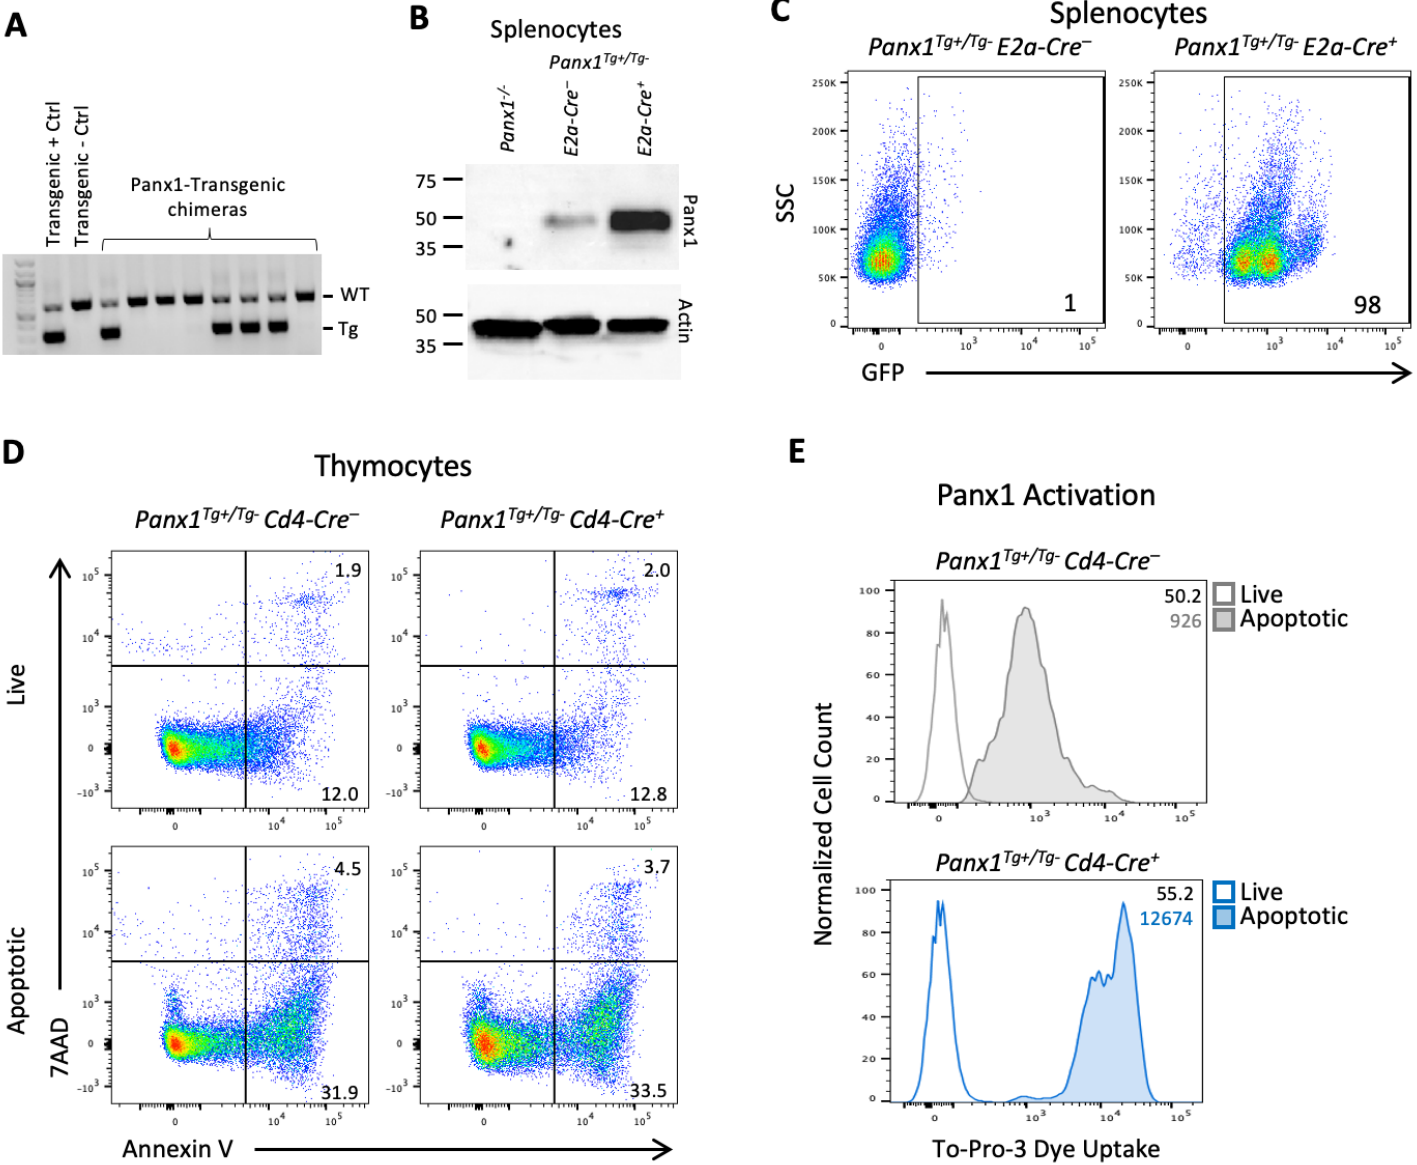

**Figure S5, related to main Figure 4. Generation and validation of *Panx1<sup>Tg</sup>* mice.**

**(A)** PCR analysis of *Panx1<sup>Tg</sup>* chimeric mouse genomic DNA to ensure proper integration of the transgene into the *ROSA-26* locus.

**(B)** Immuno blot validation of Panx1 over-expression in mice by crossing the *Panx1<sup>Tg</sup>* mice to *E2a-cre* mice and assessing Panx1 protein in the spleen. Actin expression was used as a loading control.

**(C)** Validation of eGFP expression in splenocytes from *Panx1<sup>Tg</sup> E2a-cre* or wild type control mice.

**(D)** Functional analysis of transgenic Panx1 by TO-PRO-3 dye uptake during apoptosis. *Panx1<sup>Tg</sup> Cd4-cre<sup>+</sup>* and control *Panx1<sup>Tg</sup> Cd4-cre<sup>-</sup>* thymocytes were analyzed for apoptosis induction via annexin V and 7AAD staining, and both showed comparable cell death.

**(E)** Histograms and MFI of TO-PRO-3 dye uptake within apoptotic cells of respective mice.

Figure S6- related to main Figure 5 and 6

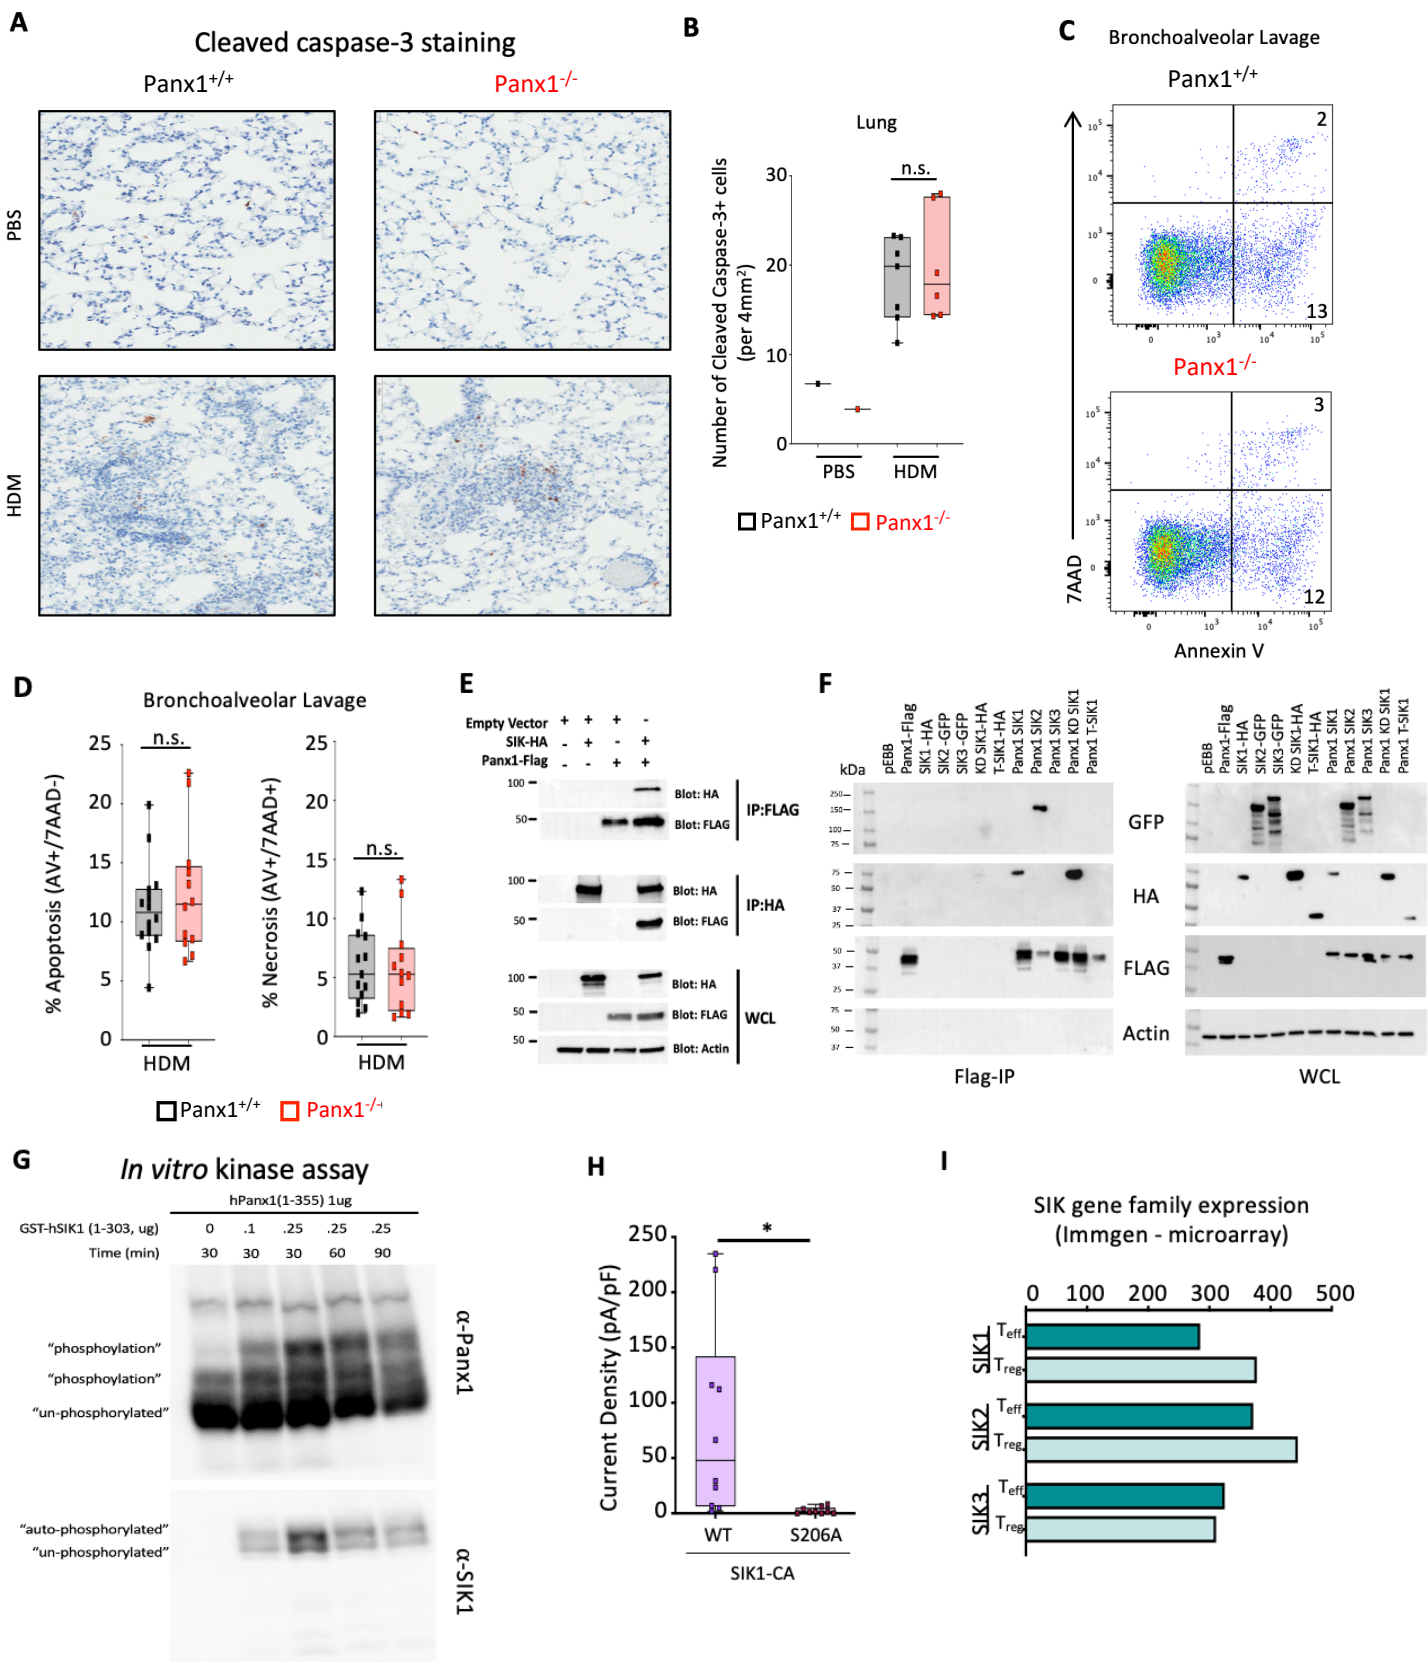

**Figure S6, related to main Figure 5 and 6. Panx1 function during airway inflammation is independent of caspases, but relies on SIK family kinases for channel activation.**

**(A)** Cleaved caspase-3 staining in lungs of wild-type and global *Panx1*<sup>-/-</sup> mice during HDM challenge or control PBS.

**(B)** Quantitation of the number of cleaved caspase-3 positive cells in wild-type and global *Panx1*<sup>-/-</sup> lungs (PBS–*Panx1*<sup>+/+</sup> *n*=1, PBS–*Panx1*<sup>-/-</sup> *n*=1, HDM–*Panx1*<sup>+/+</sup> *n*=8, HDM–*Panx1*<sup>-/-</sup> *n*=6). Unpaired Student's t-test.

**(C)** Flow cytometry plots assessing the extend of cell death (using Annexin V and 7AAD) in the BALF from wild-type and global *Panx1*<sup>-/-</sup> mice.

**(D)** Quantitative analysis of apoptosis (left, only annexin V positive) and secondarily necrotic (right, annexin V and 7AAD positive) in wild-type and *Panx1*<sup>-/-</sup> BALF (HDM–*Panx1*<sup>+/+</sup> *n*=14, HDM–*Panx1*<sup>-/-</sup> *n*=12). Unpaired Student's t-test.

**(E)** Immuno blot analysis of co-immunoprecipitations with Panx1-Flag, SIK-HA, or empty vector control in HEK293T cells. Actin was used as a whole cell lysate loading (WCL) control.

**(F)** Immuno blot analysis of co-immunoprecipitations with Panx1-Flag, SIK-HA, SIK2-GFP, SIK3-GFP, SIK1-kinase dead (KD), SIK1-truncated(T) or empty-vector control in HEK293T cells. Actin was used as a whole cell lysate loading (WCL) control.

**(G)** Phos-tag SDS page gel analysis of *in vitro* kinase assays using purified recombinant hPanx1 (1-355) and recombinant hSIK1(1-303) incubated at different concentrations and timepoints. A cleaved form of Panx1 was used for higher purification quality and the commercially purchased cleaved SIK1 is 'constitutively active'.

**(H)** Current density quantification from whole cell patch-clamp recordings of Panx1 currents in HEK293T cells transfected with SIK1-CA and either hPANX1-WT or hPANX1-S206A (\**p* <0.01). Unpaired Student's t-test.

**(I)** Gene expression data from the Immgen database assessing the relative expression of *SIK1*, *SIK2*, and *SIK3* in Teff and Treg cells.
